# Supplementary material for: Machine learning improves seasonal mass balance prediction for unmonitored glaciers
Source: Copernicus journal article supplement (doi:10.5194/egusphere-2025-1206), 2025-03-31

*We would like to extend our sincere appreciation for the reviewer's time and dedication in reviewing our manuscript. We thank the reviewer for the positive remarks and for thoughtful and constructive comments. In the following response, reviewer comments are indicated in black and our responses are indicated in blue italic font.*

### **Reviewer 1**

The paper by Sjursen et al. introduces the Mass Balance Machine (MBM), a machine learning-based model build on XGBoost, to improve seasonal and annual glacier mass balance predictions across Norway. Using ~4000 in-situ seasonal and annual point measurements from 32 glaciers between 1962 and 2021, the authors demonstrate that the model can generalize well across unmonitored glaciers with diverse climatic settings. MBM outperforms traditional temperature-index glacier evolution models (GloGEM, OGGM, and PyGEM) particularly in predicting seasonal mass balance, reducing RMSE by up to 46% (winter) and 25% (summer). The model performance is robust across multiple spatial and temporal scales, showing strong potential for enhancing hydrological predictions and climate impact assessments in glacierized regions.

I think the MBM is a very promising addition to the traditional glacier evolution models. However, at first instance after reading the manuscript I was questioning to what extent the comparison between MBM and the other models is fair because they are based on different datasets (glaciological versus geodetic) that exhibit very different characteristics. See for instance the recent papers by the GlaMBIE team (2025) and Dussaillant (preprint) who compare and combine different mass balance data sources. It seems obvious that when comparing to data of type A (which model A is trained with) model A outperforms model B (which is calibrated with data of type B). I was wondering to what extent the authors are comparing models instead of differences between datasets.

Nevertheless, I believe that the fact that the MBM can be trained with the glaciological data and still predict mass balances for unseen glaciers is its key advantage compared to traditional models. I would recommend the authors to emphasize this more and not jump to “straight-forward” conclusions too fast (such as: *the MBM is better at seasonal predictions*. Yes, it is, but it is also the only model that has seen seasonal data). In addition, I would like to see more support for the selection of features and feature importance.

The manuscript is very well written, and the language is of a high standard. Occasionally, the readability is somewhat reduced by excessive sentence length and accumulation of complex terminology. This particularly applies to the introduction, see an example below. The analysis is well described, and the figures are of high quality.

All in all, I deem the manuscript fit for publication after a major revision. The suggested changes require minimal additional analyses and some textual considerations. Please consider the more detailed list of suggestions below.

*We have carefully considered the comments and made several improvements to the manuscript in accordance with the suggestions. Here, we provide a reply to the general comments and summarize the main changes in the revised manuscript. Below, we provide a point-by-point response to the each of the specific comments.*

*The reviewer highlights that the key advantage of MBM is that it can be trained on glaciological data and therefore can predict mass balance on unmonitored glaciers. This is our view as well. Our intention is to highlight that this capability, which temperature-index approaches are currently lacking at large scales, is exactly what MBM can offer (e.g. in the abstract we highlight the potential of ML to learn relationships that are transferable in space and time, MBMs ability to generalize from sparse data to unseen test glaciers, i.e. unmonitored glaciers). Our conclusion does not suggest that temperature-index approaches cannot perform as well or better than MBM on specific glaciers if they are calibrated using the same data as MBM. Our analysis focuses on the specific application of large-scale (i.e. regional modelling) where glacier evolution models based on temperature-index approaches, that rely on glacier-specific calibration, do not have this option (since most glaciers are unmonitored). In this setting, our results clearly show that MBM outperforms the other models on seasonal predictions, precisely because it does not rely on glacier-specific data and therefore has the ability to leverage the seasonal data. Regarding the fairness of the comparison, we believe that it is fair that the models are compared according to their capabilities on the specific application, i.e. their ability to predict mass balance on unmonitored glaciers in a large-scale context. This includes their advantages and limitations with respect to their ability to leverage existing data, as explained above.*

*We thank the reviewer for pointing out that our reasoning was not clear. We have simplified the language in the abstract and introduction, considering the provided comments to highlight the context of the comparison. In addition, we have amended several formulations throughout the text to clarify our reasoning and address the concerns that have been raised in the general and specific comments. Please consider the suggested excerpts below:*

*Abstract:*

**Abstract.** Glacier evolution models based on temperature-index approaches are commonly used to assess hydrological impacts of glacier changes. However, ~~in large-scale applications, these models lack calibration frameworks that efficiently leverage~~ current model calibration frameworks cannot efficiently transfer information from sparse high-resolution observations ~~,limiting~~ across glaciers. This limits their ability to resolve seasonal mass changes on unmonitored glaciers in large-scale applications.

## Introduction:

In recent years, the use of machine learning (ML) to model glacier mass balance has emerged as a promising approach to address some of the limitations of temperature-index approaches (Steiner et al., 2005; Bolibar et al., 2020, 2022; Anilkumar et al., 2023; Guidicelli et al., 2023; Diaconu and Gottschling, 2024; van der Meer et al., 2025). ML models generalise patterns from training data and apply them to make accurate inferences on new, independent data. ~~ML models can thus utilise mass balance observations from different glaciers to~~ They can thus learn statistical relationships between mass balance components and topographical and meteorological variables that are transferable across space and time, including to unsurveyed glaciers and years (e.g. Guidicelli et al., 2023). This means that ML models can leverage sparse in situ data, such as annual and seasonal glaciological measurements, to provide high spatio-temporal resolution mass balance estimates of unmonitored glaciers across a larger region. They thus have the potential to improve the accuracy of such predictions, compared to temperature-index approaches that rely on glacier-specific calibration to multi-year geodetic observations.

balance to assess precipitation biases in climate reanalysis products (Guidicelli et al., 2023). Generalising from seasonal and annual point mass balance measurements ~~presents an opportunity to improve high spatio-temporal resolution mass balance estimates~~ offers the potential to provide high temporal resolution distributed mass balance predictions on unmonitored glaciers, ultimately ~~enhancing the accuracy of~~ improving runoff predictions from glacierised catchments. Moreover, the advantages and limitations of ML methods in this context compared to traditional modelling approaches remain unclear. Such a comparison would clarify how ML-based mass balance models could serve as a useful and complementary tool to enhance the accuracy of glacier mass balance predictions.

This study aims to evaluate the ability of an ML model to generalise spatio-temporal information across glaciers using seasonal and annual point mass balance measurements, with the goal of providing accurate, high-resolution predictions of surface mass balance on unmonitored glaciers in regional-scale applications. We present the Mass Balance Machine (MBM), a data-driven mass balance model based on eXtreme Gradient Boosting (XGBoost; Chen and Guestrin, 2016), capable of reconstructing surface mass balance up to a point scale and monthly temporal resolution for independent glaciers with diverse configurations and climatic settings across Norway. Herein, we demonstrate how MBM can incorporate observations at different temporal scales (seasonal and annual) in training and be customised to generate predictions at an even finer (monthly) temporal resolution. To assess the potential of MBM to improve glacier mass balance estimates on unmonitored glaciers, we compare its performance with state-of-the-art large-scale glacier evolution models that rely on temperature index approaches to estimate melt and are calibrated using existing frameworks and satellite-derived geodetic mass balance: the Global Glacier Evolution Model (GloGEM; Huss and Hock, 2015), the Open Global Glacier Model (OGGM; Maussion et al., 2019) and the Python Glacier Evolution Model (PyGEM; Rounce et al., 2023). Modelled mass balances are compared to observations at



## Discussion:

The ability of MBM to reconstruct winter and summer mass balance on independent glaciers highlights ~~its advantage in leveraging a major advantage compared to the glacier evolution models~~; MBM does not rely on glacier-specific data and can therefore leverage seasonal mass balance observations to derive relationships that can be transferred to unmonitored glaciers.

430 The glacier evolution models, on the other hand, do not currently use sparse in situ data in their calibration. On annual mass balance, ~~however~~, the models show similar performance. ~~With respect to this, likely because all models are informed by annual or multi-annual mass balance observations~~. However, it is important to note that for the glacier evolution models ~~are calibrated using geodetic observations (i.e. information on cumulative mass changes over multiple years) for the test glaciers cannot be considered independent in the same respect as for MBM~~ (each test glacier is individually calibrated). Meanwhile, for MBM, the

435 test glaciers serve as independent performance measures across all spatio-temporal scales. Consequently, MBM's performance solely reflects its capacity to generalise to unmonitored glaciers across varying conditions.

Given ~~the calibration of that the~~ glacier evolution models ~~calibrate parameters for each test glaciers~~ with decadal geodetic mass balance rates from Hugonnet et al. (2021), it is unsurprising that their correspondence to these observations is better than MBM (Fig. 10), which ~~have not used these observations for training has not employed data from any of these glaciers~~. However,

440 ~~we approach this comparison cautiously~~ caution should be taken in interpreting results of this comparison for specific glaciers, since elevation-change rates from Hugonnet et al. (2021) have been found to be substantially lower than those from repeat airborne laser scanning (LiDAR) surveys in Norway (two glaciers, one of which is Austdalsbreen; Fig. 10h; Andreassen et al., 2023). The quality of these geodetic observations, ~~therefore~~, likely varies between glaciers. For example, for Trollbergdalsbreen (Fig. 10d) MBM shows good performance on point mass balance (Fig. D2d), suggesting that the discrepancy between models

445 may be due to a positive bias in geodetic mass balance from Hugonnet et al. (2021). On the other hand, for Svartisheibreen

The ability of MBM to accurately predict seasonal mass balance on unmonitored glaciers makes it particularly suitable for hydrological applications, especially in glacierised catchments where seasonal observations for glacier-specific calibration of

500 other models are lacking. Another promising application of MBM is to generate distributed mass balance predictions as input

On the other hand, the purely data-driven nature of ML approaches ~~make makes~~ them uniquely suited to take advantage of the increasing availability of remote ~~sensing datasets which~~ sensing-based mass balance datasets (e.g., Belart et al., 2017; Peltó et al., 2019;

535 This could both alleviate the scarcity of in situ training data and improve model predictions. Additional data could likewise benefit temperature index approaches. However, within the current glacier-specific model calibration frameworks, such data requires regional/global spatial coverage to be readily adopted for calibration in large-scale modelling. In this respect, ML approaches present novel tools for reconciling mass balance estimates from the growing archive of glacier observations, since their flexibility allows for integration of datasets at different spatio-temporal scales in training. We have demonstrated one such

Our findings show that ML-based mass balance models have significant potential for unmonitored glaciers due to their flexibility and capacity to generalise from sparse measurements across diverse glaciers, capabilities that complement existing mod-

540 els. As demonstrated here, ML approaches show promise in overcoming some of the limitations of current temperature-index approaches and existing calibration frameworks in large-scale modelling. ML approaches are posed to leverage both existing data as well as growing observational resources from satellite remote sensing to enhance glacier mass balance estimates. In light of our findings, we argue that ML models have significant unexplored potential in glacier mass balance modelling that warrants further investigation.

## Conclusion:

The predictions of MBM were compared to established large-scale glacier evolution models GloGEM, OGGM and PyGEM applied at a regional scale and using current state of the art calibration frameworks. ~~While models showed similar performance on annual mass balance,~~ MBM was superior in predicting seasonal mass balance both at point and glacier-wide scales. This success can be attributed to MBM's ability to effectively transfer information from relatively sparse seasonal point mass balance observations to unmonitored glaciers. ~~The~~, while current large-scale evolution models do not include these sparse seasonal measurements in model calibration. The glacier evolution models, which rely on multi-year geodetic mass balance for each individual glacier, showed similar performance to MBM on annual and decadal mass balance. The main advantage of MBM is thus that it does not rely on glacier-specific observations and can therefore leverage sparse seasonal data to improve seasonal mass balance predictions across glaciers. The accuracy of MBM's seasonal predictions suggests that it can improve predictions of seasonal glacier runoff on unmonitored glaciers and thus enhance hydrological modelling in glacierised regions without in situ observations.

*In addition to textual changes, we have added a new appendix with analysis of feature importance (Appendix C), as suggested by the reviewer. This includes additional figures (Figs. C1 and C2) using different methods to assess feature importance and discussion of the findings. In addition, we have expanded on our reasoning behind feature selection, as requested by the reviewer. Please see our detailed responses below to each of the specific comments and suggested changes.*

*Again, we would like to express our gratitude to the reviewer for their time and valuable feedback. We believe the suggested changes have significantly improved the manuscript.*

## Abstract

L9: To assess the advantage MBM's generalization capabilities, --> To assess the advantage of MBM's generalization capabilities,

*Done.*

## 1. Introduction

L39-42: Despite significant efforts ... unmonitored glaciers. This is one such example of a rather long and complex sentence that reduces readability.

*We have amended the formulations at the end of this paragraph and the beginning of the next paragraph to increase readability:*

(around 0.02% of the worlds glaciers; WGMS, 2023). The scarcity of glacier-specific observations has historically posed a major challenge in ~~the calibration of~~ calibrating temperature-index approaches (e.g. Radić and Hock, 2014). ~~Despite significant efforts~~ Significant efforts have been made to develop suitable calibration techniques ~~based on~~ using limited data (e.g. Radić and Hock, 2011; Huss and Hock, 2015). However, large-scale models still suffer from transferability issues: ~~the lack of~~ they lack efficient frameworks to leverage ~~the information provided by~~ sparse in situ observations ~~to quantify~~ for quantifying mass changes on unmonitored glaciers.

45 The ~~lack of glacier-specific~~ increasing availability of geodetic mass balance observations has recently ~~has recently been alleviated by the increasing availability of geodetic mass balance observations~~ based on assessing ~~alleviated the lack of glacier-specific observations~~. These observations assess glacier surface elevation changes from time series of satellite-derived digital elevation models (DEMs) over decadal time scales (e.g. Dussaillant et al., 2019; Shean et al., 2020; Hugonnet et al., 2021). Most large-

L67: the fact that point mass balance measurements from glaciological surveys consist of stake measurements hasn't been introduced yet. It is a minor detail, but rewording "each individual stake" to e.g. "each individual mass balance stake" would improve clarity.

*This is introduced already on line 35.*

L72: The term 'generalising' has been used throughout the manuscript but at this point it was unclear to me what you mean by "Generalising from seasonal and annual point mass balance measurements". I now understand that you refer to the generalisation of distributed measurements on different glaciers (spatially), but here the emphasize seems to be on the seasonal versus annual time scales.

*We refer to both spatial and temporal generalisation. We introduce this concept on L56-60, but our formulation was perhaps unclear. We have amended the formulation on L56-60 to improve readability and highlight that we refer to both space and time: "ML models generalise patterns from training data and apply them to make accurate inferences on new, independent data. They can thus learn statistical relationships between mass balance components and topographical and meteorological variables that are transferable across space and time, including to unsurveyed glaciers and years (e.g. Guidicielli et al., 2023)." On L72, the reference to spatial generalization was implicit in our use of "generalizing from .. point" and "high spatio-temporal resolution". However, we have amended the sentence to clarify that we mean generalization both in space and time: "Generalising from seasonal and annual point mass balance measurements offers the potential to provide high temporal resolution distributed mass balance predictions on unmonitored glaciers, ultimately improving runoff predictions from glacierised catchments."*

## **2. Mass balance dataset and study area**

L94: To reduce potential confusion regarding the numbers 4170 vs 3910/3929/3751, you may change "4170 stake locations" to "4170 unique stake locations".

*We agree that this is confusing and thank the reviewer for highlighting this since it is important information. The number 4170 refers to unique combinations of stake*

*locations and years. We think the best term to use is “4170 stakes”, but specify what we mean by the term by amending the formulation as follows:*

et al., 2024), to train MBM. The dataset contains measurements at 4170 ~~stake locations~~ stakes (unique combinations of locations and years) on 32 individual glaciers on the Norwegian mainland (3082/1088 ~~stake locations~~ stakes on 22/10 glaciers in southern/northern Norway; Fig. 1) ~~and includes~~ . Each of the 4170 stakes has between one and three readings (annual, summer and/or winter), totalling 3910 annual, 3929 summer and 3751 winter point mass balance measurements (covering over the period 1962–2021; Fig. 2). In all, the 32 glaciers correspond to an area of 343 km<sup>2</sup>, or ~15% of the total glacierised area in

*We have amended this throughout the manuscript, referring to stakes and point measurements rather than stake locations.*

### **3. The Mass Balance Machine (MBM)**

L116: including the design of an independent test dataset.

*Done.*

### **3.2 Model targets and features**

*Feature selection, collinearity, and feature importance:* I support your choice of refraining from using climate derivatives such as snow depth and snow cover, but I still wonder how you came to this exact choice of climate features. Sensible and latent heat fluxes also depend on other meteorological variables, such as temperature and humidity. Why didn't you for instance use humidity directly? Have you assessed the collinearity within your feature space? I suggest to either include a collinearity assessment in your paper (appendix) or include a statement that this is not relevant or negligible depending on your findings. What made you decide to use net thermal radiation but downward solar radiation? Considering variables like the albedo makes sense based on physical relevance, but how meaningful is the albedo at the 9 km resolution of ERA5-land? In addition, I suspect many point measurements to be inside a single ERA5-land grid cell causing nearest neighbor interpolation to result in non-unique features.

Since you haven't assessed feature importance in your study (or at least not presented in this manuscript), I suggest including more information on your reasoning and considerations in the selection of climate features. To my knowledge, XGBoost returns feature importance of variables, and it would be feasible to include this analysis in the paper.

*The selection of features attempts to find a middle ground between including relevant variables for accumulation and melt, while keeping the number of variables low enough such that the results are explainable in terms of the main components of the energy balance and the meteorological variables that are considered the main drivers of mass balance variability in Norway (temperature and precipitation). Some collinearity between the meteorological variables is inevitable, for example temperature with*



sensible and latent heat fluxes, skyview factor with slope. In our experience, including additional features did not significantly affect the model performance (possibly due to collinearity). For example, using u- and v-components of the wind speed did not improve the model. We do not expect inclusion of humidity to do so either, especially when already including heat fluxes and precipitation (which we also expect is strongly correlated with this variable).

We modified the explanation (first paragraph of Appendix A2) behind the selection of features as follows:

Our choice of meteorological features is based on ~~increasing the explainability of MBM by capturing underlying meteorological drivers and avoiding the model learning relationships through confounding features.~~ We selected features that impact the ~~energy balance on the glacier surface and~~ two considerations, including variables that are relevant for glacier mass balance (accumulation and melt), while avoiding an excessive number of (confounding) features to ensure explainable results (see Appendix C). Therefore, we selected the main components of the energy balance and other meteorological variables that are considered the main drivers of mass balance in Norway (e.g. precipitation and temperature for modelling accumulation). We intentionally refrained from using high-level variables that are derived from meteorological conditions, such as snow depth, snow cover and snow melt. The reason behind this is that many meteorological variables in ERA5-Land are highly correlated and mask the underlying meteorological drivers. For example, snow depth and snow melt are highly correlated with total precipitation and 2 m air temperature, respectively. We found that ~~such variables mask the underlying meteorological drivers. As an illustration,~~ when including snow depth as a feature, ~~the~~ total precipitation becomes redundant, although it is an important driver of the evolution of the snow pack. ~~We~~ In addition, we did not see a noticeable difference in performance when using a larger set of derived variables ~~and, therefore, or~~ additional meteorological variables (such as wind speed components). Therefore, we opted not to use them both for clarity and simplicity.

The addition of a feature importance analysis is an excellent addition and we thank the reviewer for suggesting this. We added a new appendix (Appendix C: Feature importance) with a discussion of feature importance based on different methods, including two new figures showing overall feature importance in terms of weight and gain on the trained model, and monthly permutation feature importance on the test dataset. The analysis provides additional insights into the importance of different monthly features in seasonal and annual predictions, and we believe that many of the findings support the current assessment of MBM's capabilities. We suggest the following additional Appendix C2, including Figures C1 and C2:



## Appendix C: Feature importance

We performed a feature importance analysis on MBM to investigate the importance of different variables on MBM's performance. Since feature importance is complex to interpret and is not adequately represented by any single metric, we based our assessment on different metrics. We calculated weight and gain scores, which represent the total number of times a feature is used in splitting the data in a node and the average improvement in model performance (sum of loss change for each split) in splits where a feature is used, respectively. To complement this analysis, we computed monthly permutation importance for each feature. This involves consecutively permuting (shuffling) the values of each feature, breaking the relationship between the feature and prediction, and assessing the resulting change in model performance. For a given feature and month, the performance change thus represents the effect of feature permutation on the seasonal and annual predictions.

Temperature is overall the most frequently used feature in the trained model (t2m; Fig. C1a). It also scores highest in terms of gain, followed by elevation difference and downward surface solar radiation (elev\_diff and ssrd, respectively; Fig. C1b). The importance of temperature according to the weight and gain scores is not surprising given that both accumulation and melt are strongly influenced by this variable. The combination of lower gain but relatively similar weight of the remaining features may suggest that these are generally used at lower levels of the tree structures, e.g. to distinguish between smaller variability in mass balance for points on the same glacier.

Considering monthly permutation feature importance, elevation difference is an important feature in all months (Fig. C2). In mid-winter (Dec–Mar) total precipitation is the most important feature (tp; Fig. C2l and a–c) and also relatively important compared to other meteorological variables in the transition months April, October and November (Fig. C2d, j and k, respectively). This aligns with the fact that solid precipitation is the main contribution to accumulation on glaciers in Norway. In addition, precipitation is likely a key variable in explaining the substantial differences in winter mass balance rates across climatic regions in Norway.

Temperature is the main influence on model performance in the summer season (May–Sep; Fig. C2e–i). In addition, downward solar radiation and forecast albedo are important in May and June (Fig. C2e and f, respectively), which is consistent with the onset of snowmelt and subsequent changes in albedo. Although albedo is coarsely resolved, it may provide larger-scale geographical information about changes in snow cover, which may be why it is also considered somewhat important in mid-winter months. The transition months April and October show less clear importance between meteorological variables (Fig. C2d and j, respectively). This may be because the timing of transitions between seasons varies with latitude, e.g. glaciers in northern Norway may receive a fair amount of snow in April and October.

We caution against placing too much emphasis on the specific details of the feature importance analysis. For example, when assessing permutation importance, correlated features (i.e. skyview factor and slope) may appear to be less important since, even if one feature is permuted, the model can rely on a second correlated feature. However, the main findings of the feature importance analysis presented here are consistent across metrics and physically meaningful with respect to the main meteorological drivers of mass balance on Norwegian glaciers.

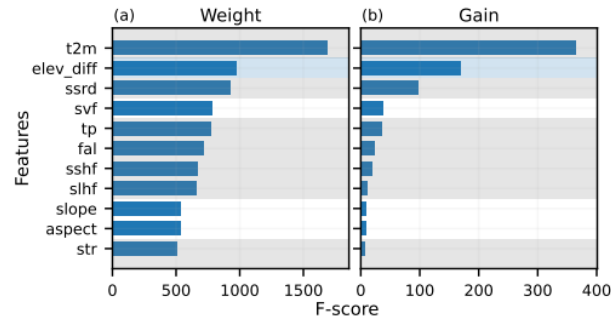

**Figure C1.** Feature importance on trained model in terms of (a) weight and (b) gain (t2m: 2 m air temperature, sshf: surface sensible heat flux, slhf: surface latent heat flux, ssrd: downward surface solar radiation, fal: forecast albedo, str: net surface thermal radiation, tp: total precipitation, elev\_diff: elevation difference between climate model and stake, svf: skyview factor). Weight represents the total number of times a feature is used to split the data, summed over all trees. Gain represents the average improvement in model performance (sum of loss change for each split over all trees) in splits which use the given feature. Shaded grey, white and blue background indicates meteorological features, topographical features and elevation difference feature, respectively.

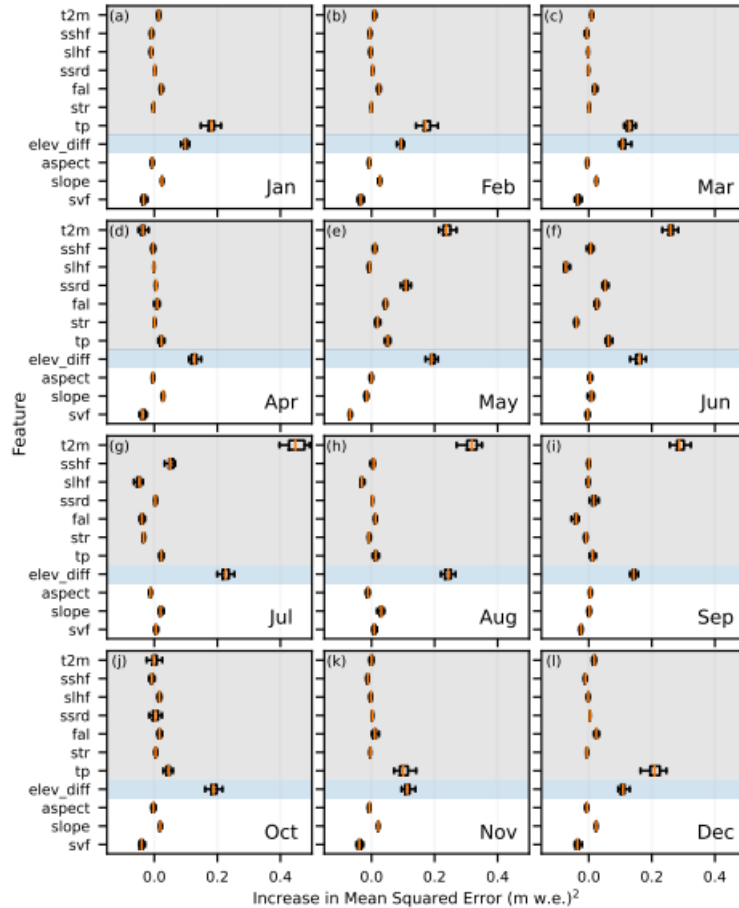

**Figure C2.** Monthly permutation feature importance on the test dataset (t2m: 2 m air temperature, sshf: surface sensible heat flux, slhf: surface latent heat flux, ssrd: downward surface solar radiation, fal: forecast albedo, str: net surface thermal radiation, tp: total precipitation, elev\_diff: elevation difference between climate model and stake, svf: skyview factor). Each feature is permuted on a monthly basis and the resulting change in model performance is computed with respect to the seasonal and annual targets. Shaded grey, white and blue background indicates meteorological features, topographical features and elevation difference feature, respectively.

*It is true that many point measurements are within a single ERA5-Land cell, such that features are in many cases non-unique on the same glacier and month. This is where the elevation difference feature and topographical features become important. These are unique to the given stake location and helps the model to reconstruct mass balance in a sub-climate model resolution. With regards to the albedo, we agree that a resolution of 9km is too coarse to resolve variations in albedo on the glacier. However, we included albedo since it may provide information about snow cover conditions on larger geographical scales (i.e. fresh or wet snow). In our opinion, this is supported by the feature importance analysis (importance of albedo in winter months and transition seasons). When including the albedo as a feature we believe it is more physically accurate to combine this with downward solar radiation instead of net solar radiation.*

L163-166: It is unclear to me how your model learns to predict monthly variability in mass balance. How can you be sure that the monthly predictions make sense? Since there is never any overlap in your seasonal mass balance measurements, couldn't *equifinality* still play a role?

*The model learns monthly variability by considering the monthly meteorological data to make predicting monthly mass balance predictions, which are aggregated and evaluated on the seasonal and annual time scales (Fig. 4). In a sense, this is similar to how temperature-index models make monthly predictions and are calibrated: they are provided monthly meteorological data and predictions are **aggregated** to the temporal resolution of the observations before they are compared. We agree that there is certainly a chance that equifinality plays some role in MBM, in terms of monthly predictions compensating each other on the seasonal time scale. For example, we would expect that if flexible dates were used to define summer and winter seasons (instead of the 1 May and 1 October limits that were used in the study), the distributions of monthly mass balances would shift somewhat, but still produce the similar seasonal results. The advantage of MBM is that it can utilize the seasonal data to reduce equifinality (i.e. compensating effects of melt and accumulation is reduced compared to using annual or multi-year mass balance). Unfortunately, we do not have data at the monthly time scale to validate predictions of any of the models. Lacking such data, the intention behind our monthly comparison is to benchmark monthly predictions across models (L239-241). In our opinion, the similarity between the monthly distributions in Fig. 9 is strong evidence that they do make sense. In addition, we believe the newly added feature importance analysis in Appendix C provides support for the physical basis of the monthly predictions.*

### **3.3 Model training and testing**

While in L191-192 you state that “The performance evaluation of MBM on the test dataset thus reflects the model’s ability to predict mass balance on glaciers without mass balance observations”, you did make sure that the distribution of both targets and

features in the train versus test dataset are similar. Is this fair? It is no surprise to me that your model can predict the mass balance on unseen glaciers ‘as long as they exist in the same distribution...’ In reality, you cannot be sure that the target of an unseen glacier fits into the distribution of targets in your training dataset, you could only know this for the features.

*It is true that we cannot know that the distribution of targets in the dataset reflects the distribution of mass balance for all Norwegian glaciers over the time period. As emphasized in the manuscript, the goal is to design MBM such that it can predict mass balance on all glaciers in Norway. The underlying assumption here is that the dataset (features and targets) reflect the true distribution of glaciers in Norway (data is identically distributed). As we have argued in the manuscript, the spatiotemporal coverage of the dataset used in the study provide a solid representation of the glacier population in Norway. Ensuring that the distribution of the training and test datasets are similar is not unfair, but reflects that each of these datasets are assumed to be drawn from this (unknown) true distribution. This is a common assumption in machine learning (together with data independence discussed in the manuscript it forms the independent and identically distributed (i.i.d.) assumption) and is why the test performance can be seen as reflecting the model’s ability to generalize.*

L215-216: If I understood correctly, the location of the stake measurements is not constant throughout the years (since you mention 4170 stake locations, but only up to 200 annual mass balance measurements per year). I assume that this reflects the displacement of a stake due to glacier flow? This usually being only a small displacement, I do not expect the topographic features to vary greatly through time. Therefore, by splitting the data in the 5-fold cross validation only based on time, I expect this to reduce the apparent importance of the topographic features. Have you considered this? Would this affect the hyperparameter tuning?

Our use of the term “stake locations” was confusing and we have specified it to combinations of stake locations and years (please see comment on L94). Stakes are usually redrilled in approximately the same location and the new location is measured using GPS. We would expect a small displacement of the stake over the year, but this should be well within the resolution of the DEM we use to extract the topographical features (90 m) such that these do not vary greatly for a stake in the same approximate location. We do not believe that splitting the data for cross-validation based on time has a significant impact on the importance of the topographical features. The topographical features are intended to determine the mass balance on a sub-climate model scale and their importance will depend on their effect on the model in combination with the meteorological features. We tested several ways of splitting the data for cross validation (including splits on years and random splitting) and did not find that this had a substantial impact on the best hyperparameter combination. In addition, the final



model (using best hyperparameters) is retrained on the full training dataset, such that the final feature importance is determined in this training.

L231: how is the R2 metric computed? Why are you comparing four different metrics but not the MSE that was used in cross-validation?

*The R<sup>2</sup> metric is also called the coefficient of determination and is computed as:*

$$R^2 = 1 - \frac{\sum_i (y_i - \hat{y}_i)^2}{\sum_i (y_i - \bar{y})^2},$$

*Where  $y_i$  are observed values,  $\hat{y}_i$  are predicted values and  $\bar{y}$  is the mean of observations. The  $R^2$  is a measure of the portion of the variance of the data that is explained by the model.*

*Training the model to minimize the MSE is essentially the same as minimizing the RMSE (the RMSE is just the square-root of the MSE, the squared difference observations and predictions are minimized in both cases). We provide RMSE instead of MSE as one of the four metrics used to evaluate and compare the models because is easier to interpret since it has the same units as the predictions (in this case, m w.e.). Overall, the four metrics provide complementary information about the fit of the models: bias, explained variance and errors (with RMSE giving more weight to outlier errors than MAE).*

#### **4. Mass balance model comparison**

L247: Unclear what “these glaciers” refers to: the whole test dataset, 11 of the 14 glaciers or the three glaciers referred to in brackets.

*This is a good point and we have now specified that we are referring to the test glaciers.*

L252-L253: is the spatial resolution in table 2 the width/height of the elevation bands? I suggest referring to this more explicitly. From what I understand, GloGEM and OGGM use a fixed vertical spacing (elevation) while PyGEM uses a horizontal spacing (distance).

*We agree that this is important to clarify and have added footnotes to Table 2 explaining the difference.*

I am wondering to what extent the resolution of these elevation bands can explain the differences in performance of the different models. How does the point elevation at the mass balance stakes compare to eg the average elevation of the model elevation bands? For instance, if for whatever reason or by coincidence the stakes are typically located at the higher end of the elevation bands, this would explain the model underestimating the mass balance.

*We agree that the different spatial resolution of the models may affect the results somewhat, but we do not believe that this is the main explanation of the difference*

between the models. We would mainly expect this to influence the point mass balance comparison (Fig. 6). However, since the overall differences in model performances in the glacier-wide comparison (Fig. 7) are similar to those of the point mass balance comparison, we do not expect the difference in vertical resolution to be a major contributor to these differences. In addition, the vertical resolution of GloGEM and OGGM are relatively high, such that the elevation differences would amount to +/- 5 to 15 meters (see for example first histogram below of vertical distance to nearest bin centers for test points using GloGEM bin centers), which we consider to be too small to have any major influence on the mass balance. Since PyGEM uses horizontal distances along a flowline, the vertical resolution will be higher in flat areas and coarser in steep areas on the glacier, such that we would expect that these effects may be more influential in steeper parts of the glacier. However, since point mass balance measurements are mainly performed on flatter areas due to accessibility, this likely does not have a major impact on the point mass balance comparison here. We also checked the vertical distance between point measurements at different elevations with respect to 100m bins used in Fig. 7 (second histogram below and example plot for Langfjordjøkelen). There is a slightly higher frequency of points at +40 m elevation, but the bulk of the distribution is around 0 to -20m elevation. Our analysis did not show any strong evidence of these differences influencing the comparison. For example, at 850 m elevation, point measurements are generally at 30-40m higher elevation than bin centers, but nevertheless match quite well with all models (Fig. 7a).

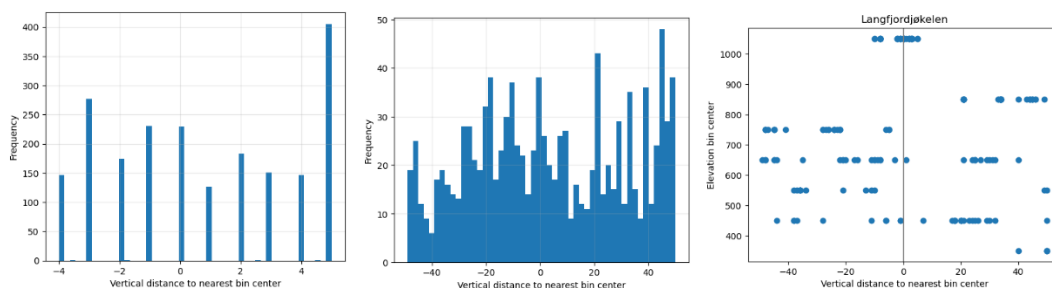

Table 2: Include Tcorr in the list of parameters for GloGEM and include the annotation <sup>e</sup> there. In caption: <sup>e</sup> only included if no match is found with other parameters within predefined bounds.

Done.

## 5.2 Model comparison on different spatio-temporal scales

L297-300: This sentence is confusing and the word ‘glacier-wide’ is often repeated. Glacier-wide mass balances are compared on different time scales. You evaluate glacier-wide predictions using seasonal and annual glacier-wide observations from glaciological records AND you evaluate decadal predictions using glacier-wide glaciological and geodetic observations. Reword to:

“Glacier-wide mass balances are compared in Sect. 5.2.3 on monthly to decadal time scales. We evaluate seasonal and annual predictions using observations from glaciological records (Kjollmoen et al., 2024), and decadal predictions using glaciological and geodetic (Andreassen et al., 2016, 2020; Hugonnet et al., 2021) observations.”

*Done. We agree that this improves clarity and thank the reviewer for the suggestion.*

Figure 6: measured --> observed point mass balance

*Changed wording in the caption from “measured” to “observed” to align with the axis labels.*

L330-331: In contrast to the glacier evolution models who exhibit too linear gradients, it seems that the MBM can predict unlikely variability in the gradients. See for instance the knickpoints at higher elevation in Figure 7a and c. These do not seem to correspond to the observations (there is no data point at this elevation). Can you explain the occurrence of such knickpoints?

*Here, we assume that the reviewer refers to the knickpoints on predicted annual and winter mass balance at the highest elevations in Fig. 7a and on predicted annual and summer mass balance in Fig. 7c. We expect these to be artefacts of the model due to coarsely resolved climate data and the lack of measurements (training data) at higher elevations on many glaciers (similar to what can be seen on Tunsbergdalsbreen in Fig. 11). Such artefacts may be mitigated by higher resolution climate data or extracting climate data from a single ERA5-Land cell (instead of using all cells that cover the glacier), such as described in Section 6.2.1. However, not all such knickpoints are unlikely. For example, for annual and winter mass balance at the highest elevation in Fig. 7c, point measurements indicate reductions in annual and winter mass balance that the models are not able to predict and that are perhaps the result of redistribution of snow by wind at higher elevations.*

Figure 7: the almost vertical lines in 7f demonstrate the equifinality issue with the glacier evolution models being calibrated with glacier-wide 20-year average geodetic data and no way of knowing whether there is a shallow or steep mass balance gradient.

*We agree with this observation and believe that this illustrates the advantage of MBM being able to use sparse point mass balance data on different glaciers, compared to temperature-index approaches, which are dependent on calibration to observational data at the scale of individual glaciers (for which 20-year average geodetic data is currently the option). Please see our reply to comment on L414 and reply to general comments.*

L371-372: This is a fair point, but the opposite is also true. The predictions by MBM correspond better to the glaciological observations because they are trained using this

data. Even though you test the model on unseen glaciers, you still train the model using data with similar variability, while the glacier evolution models are calibrated with a 20-year average and will never learn the interannual variability. This could be emphasized more.

*The specific formulation on L371-372 refers to the rigorousness of the comparison of model performances on this specific dataset, not the underlying explanations for why performance of the models differ on different spatiotemporal scales. The performance comparison on the 20-year geodetic data is not very rigorous for the glacier evolution models since the same data was used to calibrate these models (could be viewed as showing MBM's performance on its training data), as opposed to being an independent dataset for MBM. We included a more rigorous comparison at decadal time scales in Fig. C4, where the dataset is independent in space and time for MBM and independent in time for the glacier evolution models. Thus, we do not agree that the opposite is true with respect to MBM since it is always compared on independent data. However, we realize that this was not clear and thank the reviewer for pointing that out. We have reformulated the sentence on L371-372 and sentences in Section 6.1.2 that refer to the same, please see excerpts below.*

*However, we agree that MBM is better at reconstructing seasonal and annual mass balance because it has been trained using this data, while the glacier evolution models have not (and cannot use this effectively in large-scale modelling). Please see our reply to comment on L414 and reply to general comments.*

In general, glacier evolution models show a better correspondence with decadal geodetic mass balance rates from satellite-derived DEMs (Hugonnet et al., 2021), which is unsurprising given that ~~these observations are used in model calibration~~each test glacier is calibrated using these observations (not independent data). Specifically, MBM overestimates geodetic mass

The ability of MBM to reconstruct winter and summer mass balance on independent glaciers highlights ~~its advantage in leveraging a major advantage compared to the glacier evolution models~~MBM does not rely on glacier-specific data and can therefore leverage seasonal mass balance observations to derive relationships that can be transferred to unmonitored glaciers.   
430 ~~The glacier evolution models, on the other hand, do not currently use sparse in situ data in their calibration.~~ On annual mass balance ~~, however,~~ the models show similar performance. ~~With respect to this, likely because all models are informed by annual or multi-annual mass balance observations.~~ However, it is important to note that ~~for the glacier evolution models are calibrated using geodetic observations (i.e. information on cumulative mass changes over multiple years) for the test glaciers cannot be considered independent in the same respect as for MBM~~ (each test glacier is individually calibrated). Meanwhile, for MBM, the   
435 test glaciers serve as independent performance measures across all spatio-temporal scales. Consequently, MBM's performance solely reflects its capacity to generalise to unmonitored glaciers across varying conditions.

Given ~~the calibration of that the~~ glacier evolution models calibrate parameters for each test glaciers with decadal geodetic mass balance rates from Hugonnet et al. (2021), it is unsurprising that their correspondence to these observations is better than MBM (Fig. 10), which ~~have not used these observations for training~~has not employed data from any of these glaciers. However,   
440 ~~we approach this comparison cautiously~~caution should be taken in interpreting results of this comparison for specific glaciers, since elevation-change rates from Hugonnet et al. (2021) have been found to be substantially lower than those from repeat airborne laser scanning (LiDAR) surveys in Norway (two glaciers, one of which is Austdalsbreen; Fig. 10h; Andreassen et al., 2023). The quality of these geodetic observations, therefore, likely varies between glaciers. For example, for Trollbergdalsbreen (Fig. 10d) MBM shows good performance on point mass balance (Fig. D2d), suggesting that the discrepancy between models   
445 may be due to a positive bias in geodetic mass balance from Hugonnet et al. (2021). On the other hand, for Svartisheibreen



L373-375: Please consider the uncertainties of the geodetic data. I suspect the over- or underestimation of the models to still be within the 95% confidence bound of the geodetic data.

*We are unsure if this comment refers to inclusion of uncertainty estimates in the Figs. 10 and C4, or if our consideration of over- or underestimation with respect to the uncertainty bounds in Fig. 10 is vague. Since uncertainty in the geodetic mass balance from Hugonnet et al. (2021) and geodetic mass balance from NVE (reported 1-sigma uncertainties for both datasets) is already shown in Figs. 10 and C4, we assume the comment refers to the latter. The specific examples of over- or underestimation mentioned here are cases where MBMs predictions are outside the 1-sigma uncertainties for both decades in Fig. 10. We have now specified this in the text by amending the formulation as follows:*

|                                                                                                                                                                                                                                                                                                                                                                                             |
|---------------------------------------------------------------------------------------------------------------------------------------------------------------------------------------------------------------------------------------------------------------------------------------------------------------------------------------------------------------------------------------------|
| Specifically, MBM overestimates geodetic mass balance for Bondhusbrea, Møsevassbrea and Blomstølskardsbreen (Fig. 10i, k and l, respectively) and underestimates for Langfjordjøkelen and Trollbergdalsbreen (Fig. 10a and d, respectively) when comparing to satellite-borne geodetic mass balance ( <u>prediction outside uncertainty bounds for both decades</u> ). However, considering |
|---------------------------------------------------------------------------------------------------------------------------------------------------------------------------------------------------------------------------------------------------------------------------------------------------------------------------------------------------------------------------------------------|

## Discussion

L394: How can you be sure that MBM effectively downscales the meteorological data instead of relying on the high-resolution topographic features? Is there any way to support this statement? A feature importance analysis may have provided more insights in this. Alternatively, although this is most probably not within the scope of this manuscript, one could have compared the performance of MBM with coarse meteorological data + elevation difference to already downscaled meteorological data. Or you could have explicitly learned the MBM to downscale climate data using some high-resolution climate variable as additional target. It may have been that elevation difference “appears” to be important because it is one of the few variables that are actually unique for each stake location. Without any support, I question whether you can make the statement that MBM effectively downscales. Especially with regards to Figure 11.

*The newly added feature importance analysis (Appendix C) shows that elevation difference is an important feature, which we would expect since it is the main variable that relates the climate data to the resolution of the point measurements. If the downscaling was done manually, the elevation difference between the climate model and point location would also be very important. Hence, it is It natural that this variable is frequently used in MBM and considered important. Monthly temperature and precipitation are the most important variables in the winter and summer months, respectively (Fig. C2), in addition to elevation difference. We think this indicates that it is implicitly used to downscale these variables to the higher-resolution grid. However, we*

*agree that the statement we made is perhaps too strong, so we moderated our statements in Section 6.1.1. as follows:*

400 ~~MBM-effectively-~~The performance of MBM on point mass balance and the apparent importance of the elevation difference feature (see feature importance analysis in Appendix C) suggests that MBM implicitly downscales and bias-corrects relatively coarse meteorological data to the point scale. In addition to the spatio-temporal transfer of mass balance information across glaciers, MBM's apparent downscaling capacity is crucial for generating accurate high-resolution predictions. For instance, ~~as accumulation is primarily governed by precipitation and temperature,~~ MBM's strong performance in reconstructing winter mass balance at the stake level (Fig. 5a and b) ~~shows its ability to downscale these variables,~~ together with a high importance of precipitation and elevation difference features in winter months (Fig. C2a-c and k-l), suggests that it is able to downscale precipitation locally. The ~~key to MBM's downscaling abilities~~ same is true for temperature in the summer months (Fig. C2e-i). The key to this ability lies in using the elevation difference between the stake and the climate model as a feature (Fig. 3) which enables MBM to effectively map the relationship between climate and elevation.

*We agree that an interesting avenue for future development of MBM is to compare its performance for different resolution climate data. Similar work is already ongoing in applications to other regions in Europe and we expect MBM to benefit from using higher-resolution meteorological data. We suggest this in Section 6.2.1, but have now specified that higher-resolution meteorological data can clarify the downscaling-capabilities of MBM:*

465 variables from the DEM, specifically a steep, south-west facing wall that borders the glacier tongue. The issues outlined here may be mitigated by extracting meteorological variables from a single ERA5-Land cell closest to the glacier centre~~or~~. Another option would be to train MBM using higher-resolution meteorological data, which may also elucidate MBM's downscaling capabilities. Regardless of these challenges, ~~MBM's~~ our results show that MBM excels in reconstructing local winter mass balance, which indicates implicit downscaling and bias correction of meteorological variables ~~excel in reconstructing local~~ winter mass balance (Figs. 6 and 7). This suggests, in line with other findings (Guidicelli et al., 2023), that ML models are valuable tools to assess spatio-temporal biases in precipitation estimates in mountain regions.

L414: I think it is important to distinguish between and not confuse two different assets of your model: 1) it can predict mass balances for unmonitored glaciers while the glacier evolution models need calibration data for every single glacier, and 2) it is trained with seasonal and annual data while the glacier evolution models were only provided on single 20-year average value. I think the first point is the big advantage of the MBM and this should be highlighted more, while the second point is an artifact of the first. Because regular models need data for every glacier it cannot be calibrated with the higher temporal resolution data because this is only available for a limited number of glaciers.

*We do not completely agree with this reasoning. The reason that MBM can predict seasonal mass balance for unmonitored glaciers is specifically because it can be trained on seasonal data. For the type of application/ regional modelling of a large set of glaciers with sparse in situ measurements: 1) machine learning models can learn relationships from data and do not require data specific to a given glacier to learn relationships between climate and mass balance on that glacier, while the glacier evolution models need calibration data specific to the given glacier to learn these*

relationships. 2) Machine learning models can therefore be trained using sparse, in situ data (e.g. point mass balance in this case), while the glacier evolution models rely on datasets available for all glaciers (it is true that for the glaciers with glaciological data, the glacier evolution model could be calibrated to these specific glaciers, but that option does not exist for the vast majority of “unmonitored” glaciers). 3) Since MBM is able to use the seasonal data it can improve seasonal predictions compared to the glacier evolution models, which cannot use this data effectively.

To clarify our reasoning we have made several updates to the text throughout the manuscript (please see our reply to the general comments), in addition to the following changes in the section related to this specific comment:

The ability of MBM to reconstruct winter and summer mass balance on independent glaciers highlights ~~its advantage in leveraging a major advantage compared to the glacier evolution models: MBM can leverage~~ seasonal mass balance observations to derive relationships that can be transferred to unmonitored glaciers. On annual mass balance ~~however~~, the models show similar performance. ~~With respect to this, likely because all models are informed by annual or multi-annual mass balance observations. However,~~ it is important to note that ~~for the glacier evolution models are calibrated using geodetic observations (i.e. information on cumulative mass changes over multiple years) for the test glaciers cannot be considered independent in the same respect as for MBM (each test glacier is individually calibrated).~~ Meanwhile, for MBM, the test glaciers serve as independent performance measures ~~on~~ across all spatio-temporal scales. Consequently, MBM’s performance solely reflects its capacity to generalise to unmonitored glaciers across varying conditions.

L451-453: It is unclear what you mean. How does the steep terrain influencing the tongue affect the more negative mass balance for steep and south-facing slopes?

We thank the reviewer for pointing out that this explanation was not clear. The steep terrain around the glacier tongue influences the calculation of slope and aspect from the DEM, such that the border of the tongue is seemingly steep and southwest-facing (while in reality it is flatter and more southeast-facing (like the remainder of the tongue). These artefacts in the topographical features influence MBM’s predictions (which are likely too negative here). We have changed the formulation in order to clarify this explanation:

can resolve smaller-scale variations. Artefacts in the topographical ~~data may, therefore, influence predictions, for example, the high features may therefore influence predictions. For example, MBM predicts high summer melt rates along the border~~ on eastern border of the tongue of Tunsbergdalsbreen (Fig. 11c). ~~Here, MBM predicts more negative mass balance for We believe this is due to the combination of steep and south-facing south-west facing slopes (Fig. 11g and h). However, these artefacts likely steep, south-west facing slopes are likely topographical artefacts. They result from the calculation of slope and aspect arising from the influence of the steep terrain surrounding the surrounding terrain influencing the calculation of these variables from the DEM, specifically a steep, south-west facing wall that borders the glacier tongue. The issues outlined~~

L463: In my opinion, it is not necessary a bad thing to assess the capability of your model in ‘extrapolating’ to adjacent glaciers. It would be interesting to include a little more of your findings regarding the ability to extrapolate in relation to the distance away from the nearest ‘seen’ glacier.

We thank the reviewer for suggesting this interesting analysis that we had not performed. We compared the performance of MBM on the test glaciers to the distance between

each test glacier and the nearest training glaciers. The first figure below shows all the test glaciers, while the second figure excludes the two glaciers in northern Norway that have large distances to the nearest glacier. Interestingly, the analysis does not show any correlation between the distance to the nearest training glacier and test glacier performance (which is also what we aim for since spatially correlated errors would suggest that our test glaciers are not independent). This is for example also illustrated by comparing Figs. D2 i-l (test glaciers in the Folgefonna region). Of these glaciers, the glacier in Fig. D2i shows the worst performance, but is the closest to a training glacier (around 4 km), while the other glaciers (Figs. Dj-l) show better performance but are up to 12 km away from the nearest training glacier). We think this analysis suggests that model performance on the test glaciers is more closely related to how well the trained model captures the relationship between mass balance and meteorological and topographical features in different regions of the feature space.

Based on this finding, we included the following in Section 6.2.2.:

485 likely extends beyond the ice divide. However, the current configuration is necessary to both train MBM and evaluate its performance in this climatic region. Overall, we did not find any correlation between model performance on the test glaciers and the distance to the nearest training glacier. This is illustrated by the four glaciers in the Folgefonna region (Fig. D2i-l), where the test glacier closest to a training glacier (around 4 km, Fig. D2i) shows worse performance than the glaciers located farther away (up to 12 km, Fig. D2j-l). We encourage future studies using ML approaches to carefully design test datasets

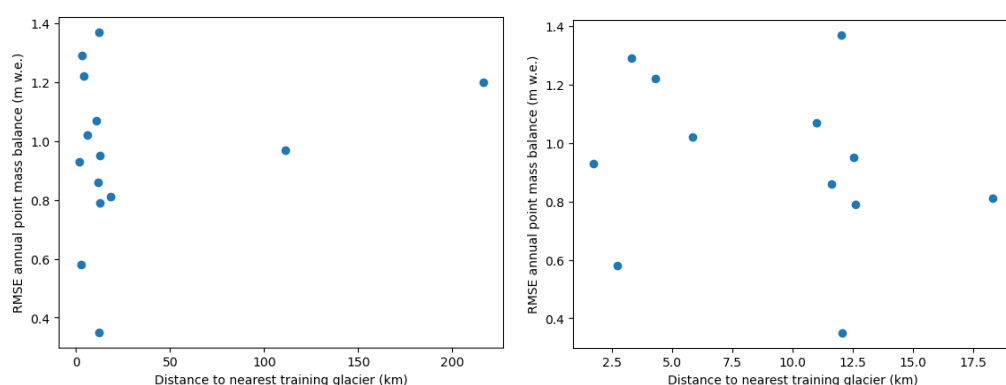

Supplement: Supplementary file [file egusphere-2025-1206-AC1-supplement.pdf]
